# Supplementary material for: Comparison of Genotype II African Swine Fever Virus Strain SY18 Challenge Models
Source: MDPI journal article supplement (doi:10.3390/v15040858), 2023-03-27
Supplement: s1 [file s1]

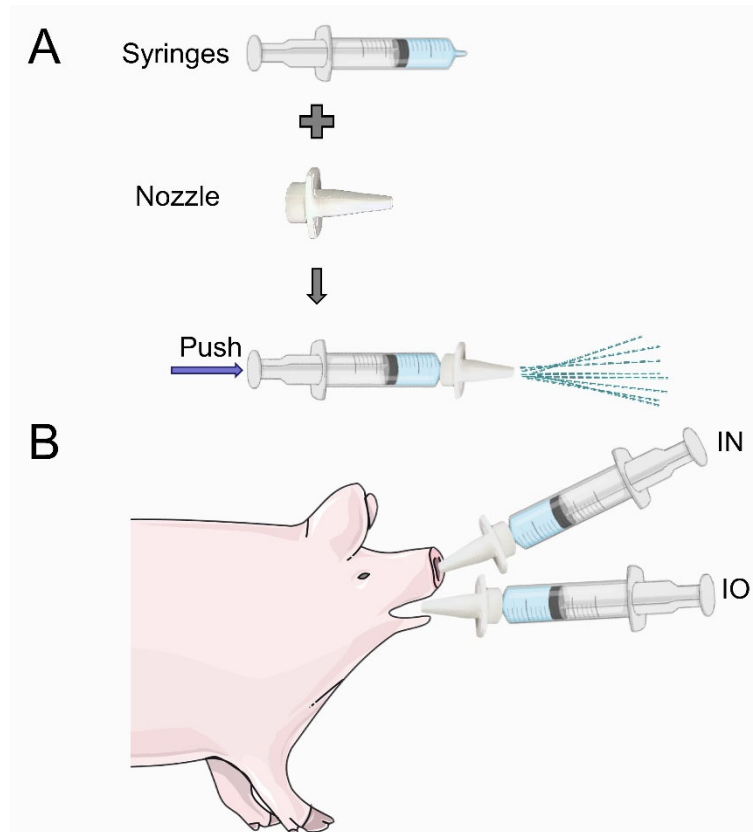

**Figure S1:** Intraoral and intranasal infection with ASFV SY18 using a nozzle. (A) Aerosol treatment of virus-containing liquids with nozzles; (B) Intraoral and intranasal infection

**Table S1.** Clinical scoring scale

| Clinical Signs      | lever                                   | Score <sup>a</sup> |
|---------------------|-----------------------------------------|--------------------|
| Rectal temperature  | < 40.0                                  | 0                  |
|                     | 40.0 ≤ to < 40.5                        | 1                  |
|                     | 40.5 ≤ 41                               | 3                  |
|                     | > 41                                    | 5                  |
| Lost appetite       | Reduced eating                          | 1                  |
|                     | Only picking at food                    | 3                  |
|                     | Not eating                              | 6                  |
| Reluctance to stand | Lethargic                               | 1                  |
|                     | Get up only when touched                | 3                  |
|                     | Remain ecumbent when touched            | 6                  |
| Wheezing/ coughing  | Occasional                              | 1                  |
|                     | Severe                                  | 3                  |
| Ocular discharge    | Discharge around eyes                   | 1                  |
| Enlarged joints     | Mild joint swelling                     | 1                  |
|                     | Severe swelling with difficulty walking | 4                  |
| Skin Purpura        | Redness of the skin                     | 1                  |
|                     | Purple-black petechiae under the skin   | 3                  |
| Diarrhoea           | With symptoms                           | 1                  |

| Bloody diarrhoea                                                                                                   | With symptoms | 4 |
|--------------------------------------------------------------------------------------------------------------------|---------------|---|
| <sup>a</sup> Only the most severe one of each symptom was scored. Scores would not be accumulated to the next day. |               |   |

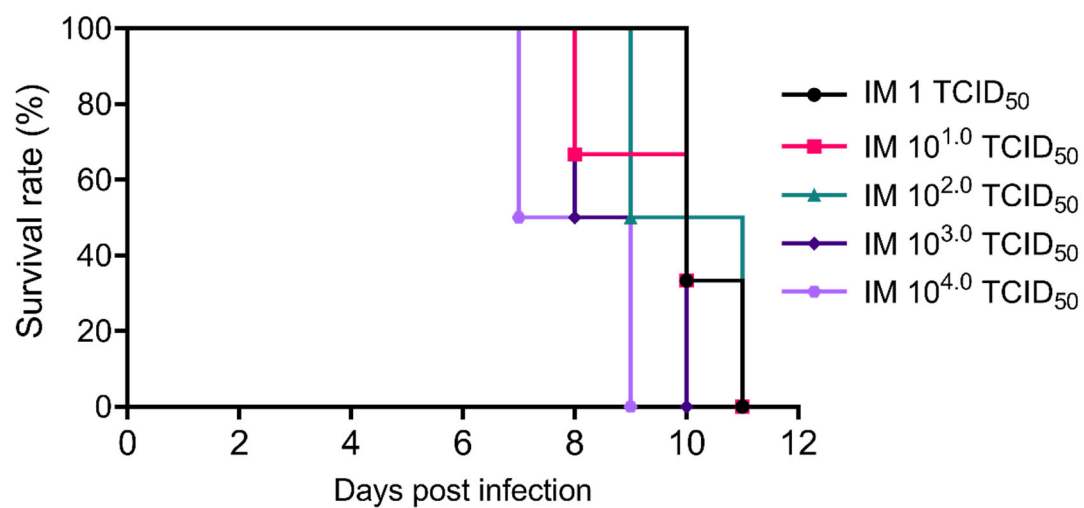

**Figure S2:** Survival rates of pigs infected with ASFV SY18 by intramuscular (IM) injection at doses of 1 TCID<sub>50</sub>-10<sup>4.0</sup> TCID<sub>50</sub>.
